# Supplementary material for: Solvent-driven sod-ZIF-8 ↔ ZIF-C phase transformation preserves nucleic acid functionality for gene delivery
Source: Royal Society of Chemistry journal article supplement (doi:10.1039/d5lf00306g), 2025-12-19
Supplement: d5lf00306g1.pdf [file d5lf00306g1.pdf]

## Supplementary Information

### Solvent-driven sod-ZIF-8 $\leftrightarrow$ ZIF-C phase transformation preserves nucleic acid functionality for gene delivery

Shakil Ahmed Polash,<sup>1,2</sup> Arpita Poddar,<sup>3</sup> Francesco Carraro,<sup>4</sup> Gary Bryant,<sup>2</sup> Paolo Falcaro<sup>4\*</sup> and Ravi Shukla<sup>1,2,5\*</sup>

<sup>1</sup>*Sir Ian Potter NanoBiosensing Facility, NanoBiotechnology Research Laboratory, RMIT University, Melbourne, Victoria 3000, Australia*

<sup>2</sup>*School of Science, STEM College, RMIT University, Melbourne, Victoria 3000, Australia*

<sup>3</sup>*Fiona Elsey Cancer Research Institute, Ballarat, Victoria 3350, Australia*

<sup>4</sup>*Institute of Physical and Theoretical Chemistry, Graz University of Technology, Graz 8010, Austria*

<sup>5</sup>*Centre for Advanced Materials & Industrial Chemistry, RMIT University, Melbourne, Victoria 3000, Australia*

\* Corresponding author:

Paolo Falcaro (paolo.falcaro@tugraz.at)

Ravi Shukla (ravi.shukla@rmit.edu.au)

Table S1. Comparison of liposomal and ZIF-based (MOF) non-viral delivery systems.

| <b>Feature</b>      | <b>Liposomal systems</b>                                  | <b>ZIF based (MOF) systems</b>                                                                                   | <b>Ref.</b> |
|---------------------|-----------------------------------------------------------|------------------------------------------------------------------------------------------------------------------|-------------|
| Clinical status     | Clinically validated; used in mRNA and siRNA therapeutics | Emerging platform; preclinical development                                                                       | [1, 2]      |
| Biocompatibility    | Well-characterized and generally high                     | Good, but dependent on metal-ligand chemistry and cargo interactions                                             | [1-3]       |
| Colloidal stability | Can be limited in serum-rich environments                 | Typically robust; stability varies with phase/solvent                                                            | [4, 5]      |
| Cargo protection    | Moderate; potential for leakage or enzymatic degradation  | Strong encapsulation protects nucleic acids                                                                      | [5]         |
| Release mechanism   | Membrane fusion; tunable with formulations                | Intrinsic pH-responsive degradation enables controlled release                                                   | [4, 5]      |
| Storage needs       | Often require cold-chain stability                        | Generally stable at room temperature                                                                             | [6, 7]      |
| Loading capacity    | Moderate                                                  | High due to porous crystalline structure                                                                         | [5]         |
| Tunability          | Through lipid composition and surface modification        | Through metal-ligand chemistry, surface chemistry, porosity, and crystal phase                                   | [4, 5]      |
| Strengths           | Clinically proven, versatile, biocompatible               | Robust structure, strong cargo protection, pH-responsive release, high degree of flexibility and customizability | [4, 5]      |
| Current limitations | Stability and leakage challenges; storage constraints     | Phase behaviour under physiological conditions is still being fully characterized                                | [4, 5]      |

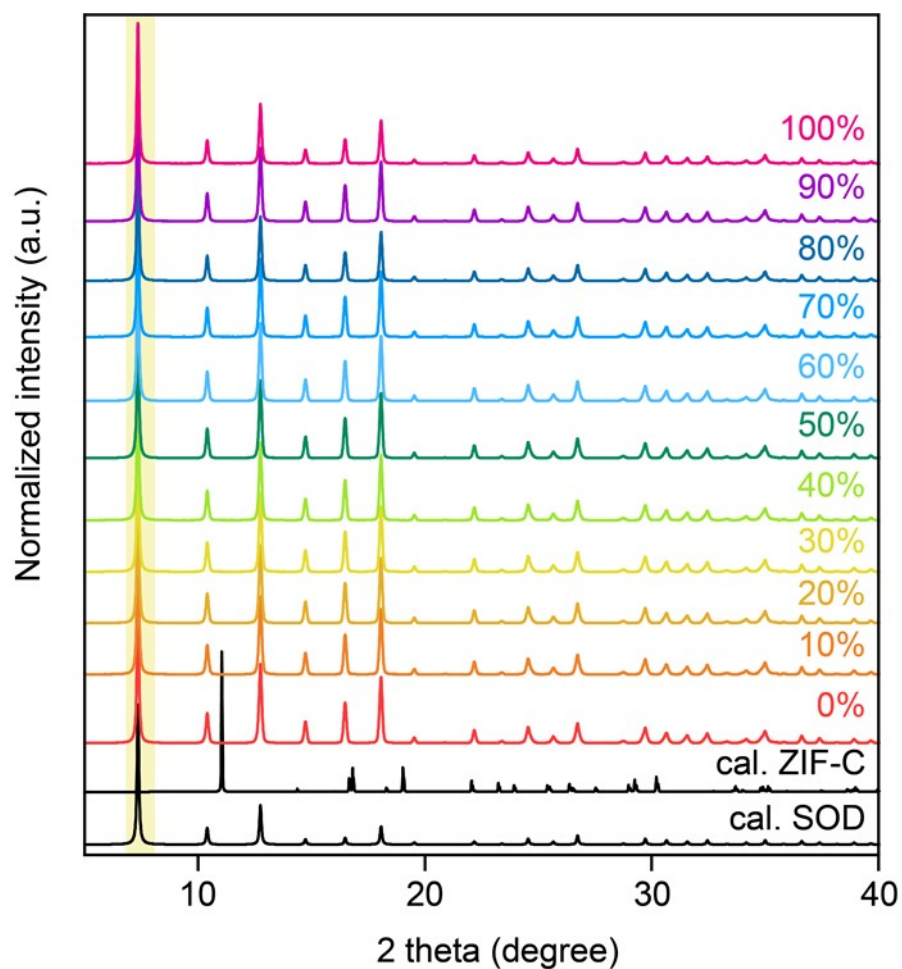

**Fig S1.** X-ray diffraction of DNA@ZIF synthesized using precursors made in ethanol.

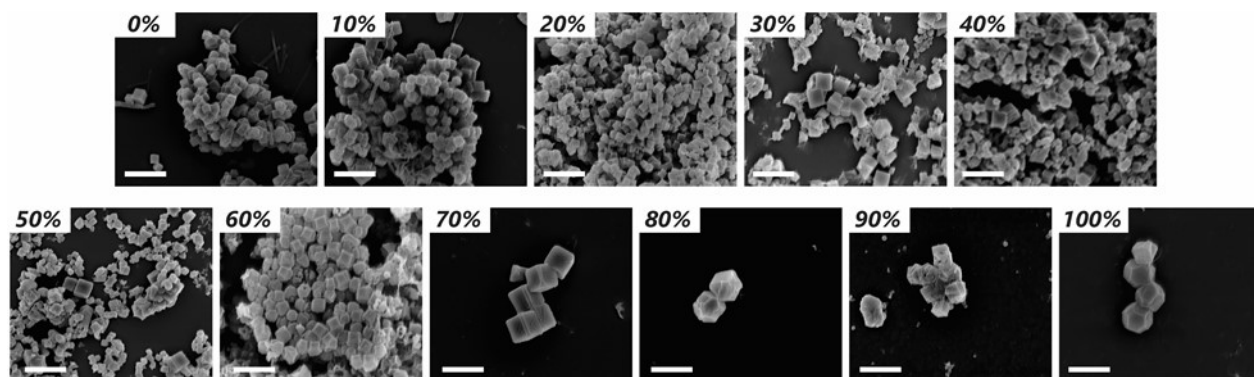

**Fig S2.** SEM images of DNA@ZIF were prepared with ethanolic 2HmIm and  $\text{Zn}(\text{OAc})_2$  and washed with different % of water in ethanol. Scale bar 500 nm.

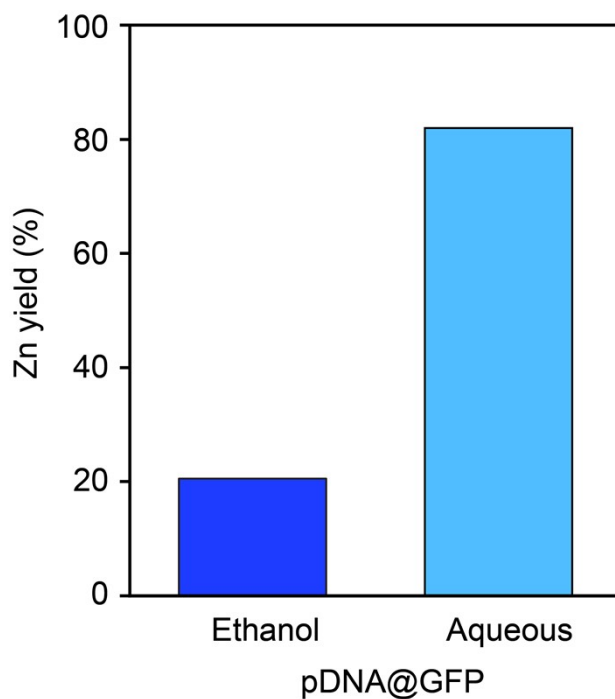

**Fig S3.** Zn yield (%) in DNA@ZIF prepared using organic (i.e., ethanol) and inorganic (i.e., water) conditions.

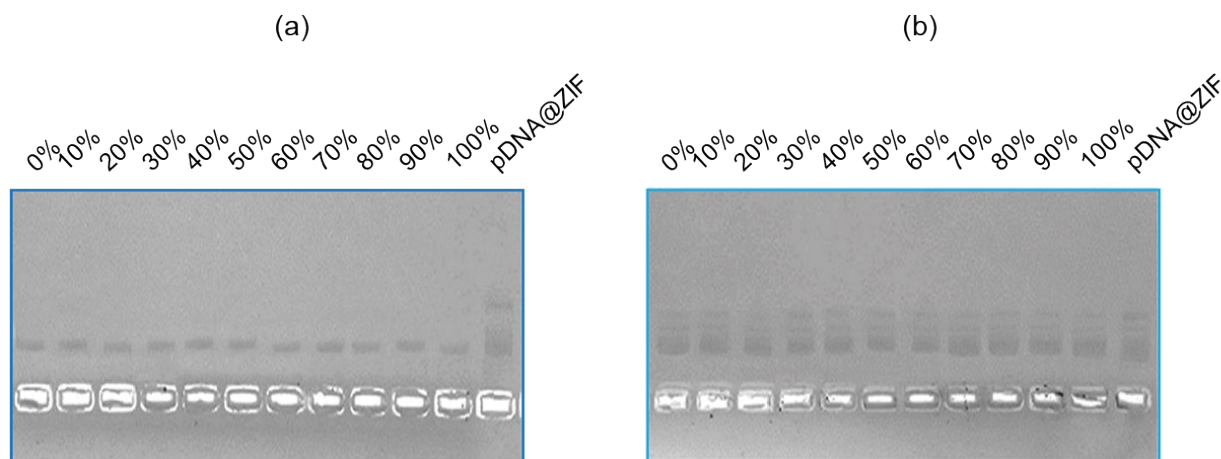

**Fig S4.** Agarose gel electrophoresis of DNA@ZIF prepared with (a) alcoholic and (b) aqueous precursors. The precipitates were washed with 0-100% of water in ethanol.

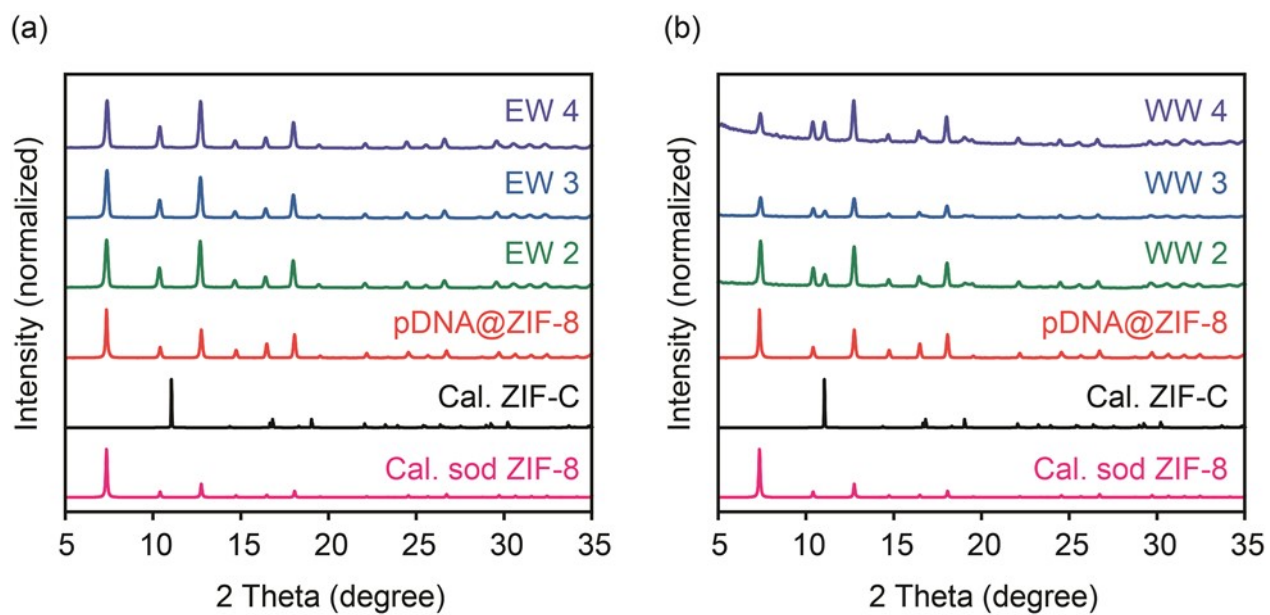

**Fig S5.** XRD of DNA@ZIF-8 after (a) ethanol wash (EW) and (b) water wash (WW). The numbers represent the washing steps.

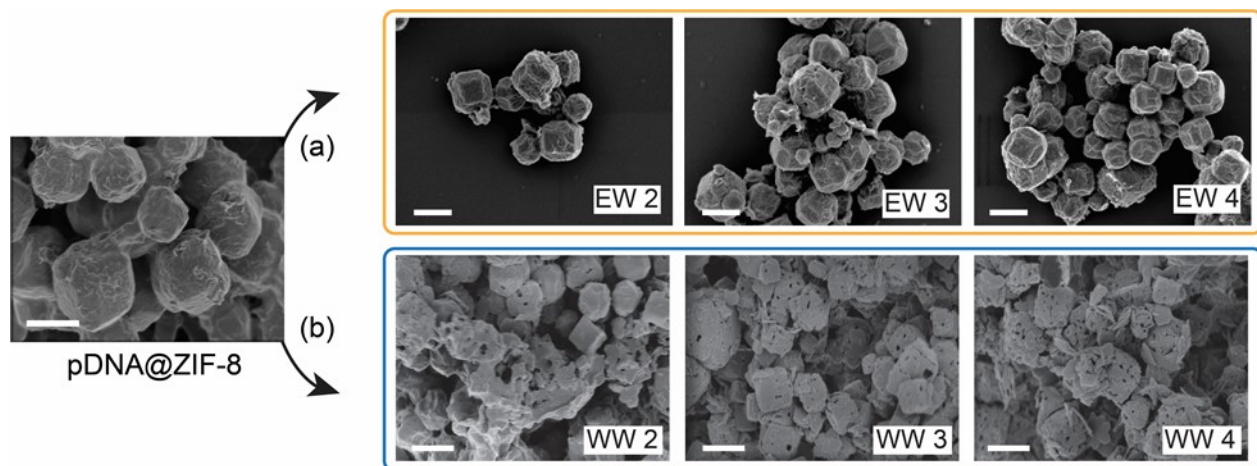

**Fig S6.** SEM of DNA@ZIF-8 after (a) ethanol wash (EW) and (b) water wash (WW). The numbers represent the washing steps. Scale bar refers 500 nm.

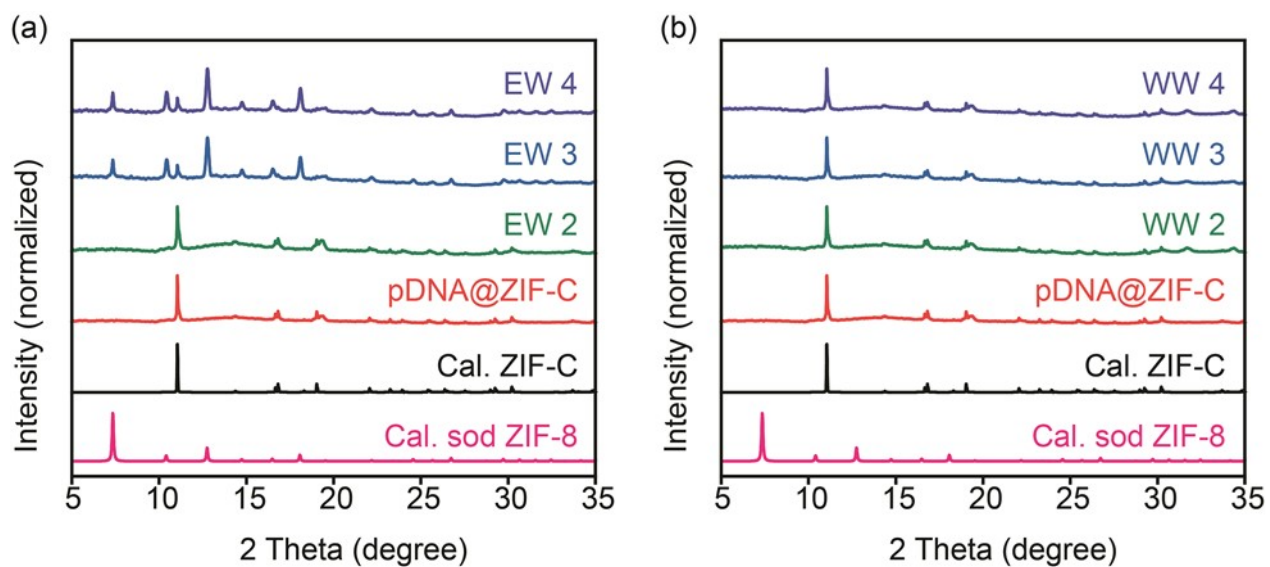

**Fig S7.** XRD of DNA@ZIF-C after (a) ethanol wash (EW) and (b) water wash (WW). The numbers represent the washing steps.

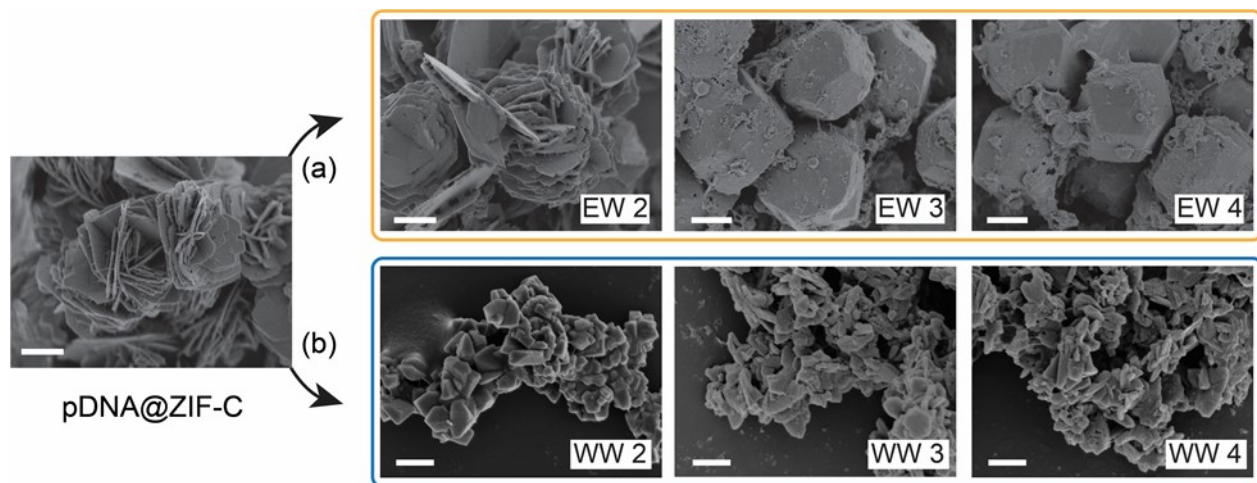

**Fig S8.** SEM of DNA@ZIF-C after (a) ethanol wash (EW) and (b) water wash (WW). The numbers represent the washing steps. Scale bar refers 500 nm.



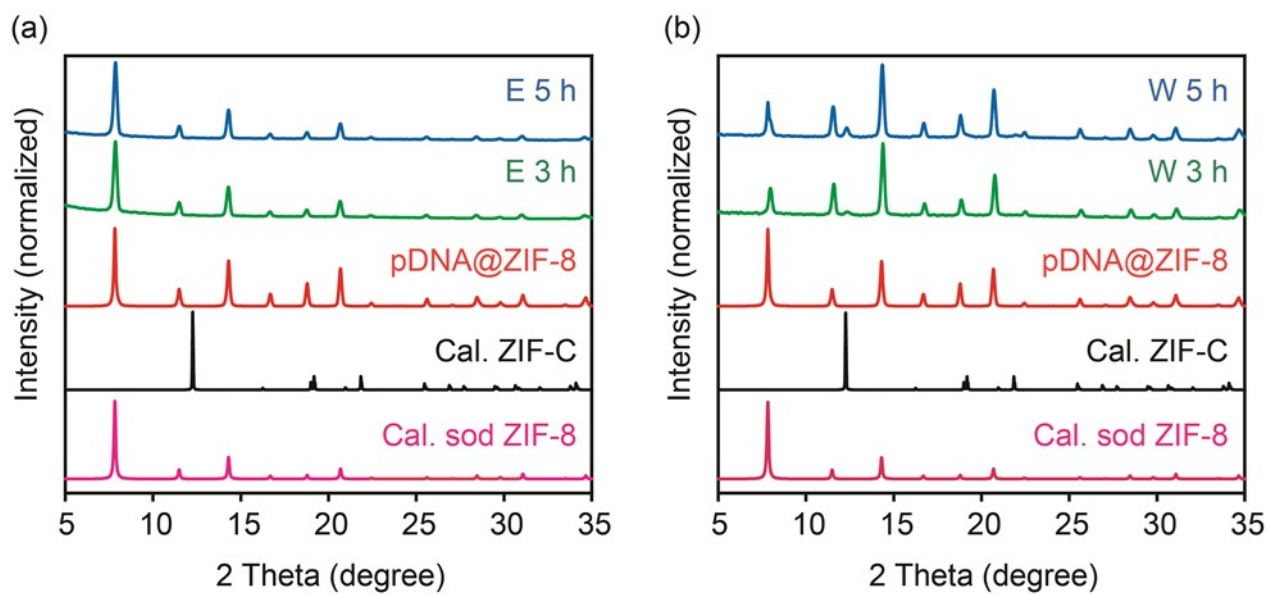

**Fig S9.** XRD of DNA@ZIF-8 after (a) ethanol (E) and (b) water (W) incubation.

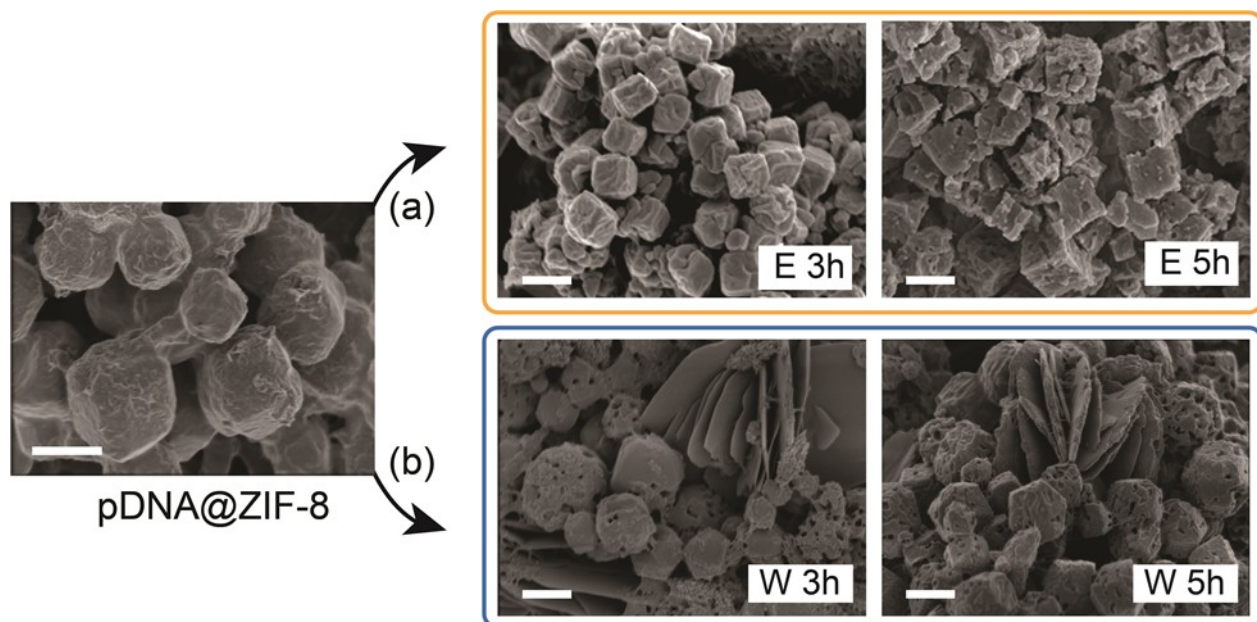

**Fig S10.** SEM of DNA@ZIF-8 after (a) ethanol (E) and (b) water (W) incubation. Scale bar refers 500 nm.

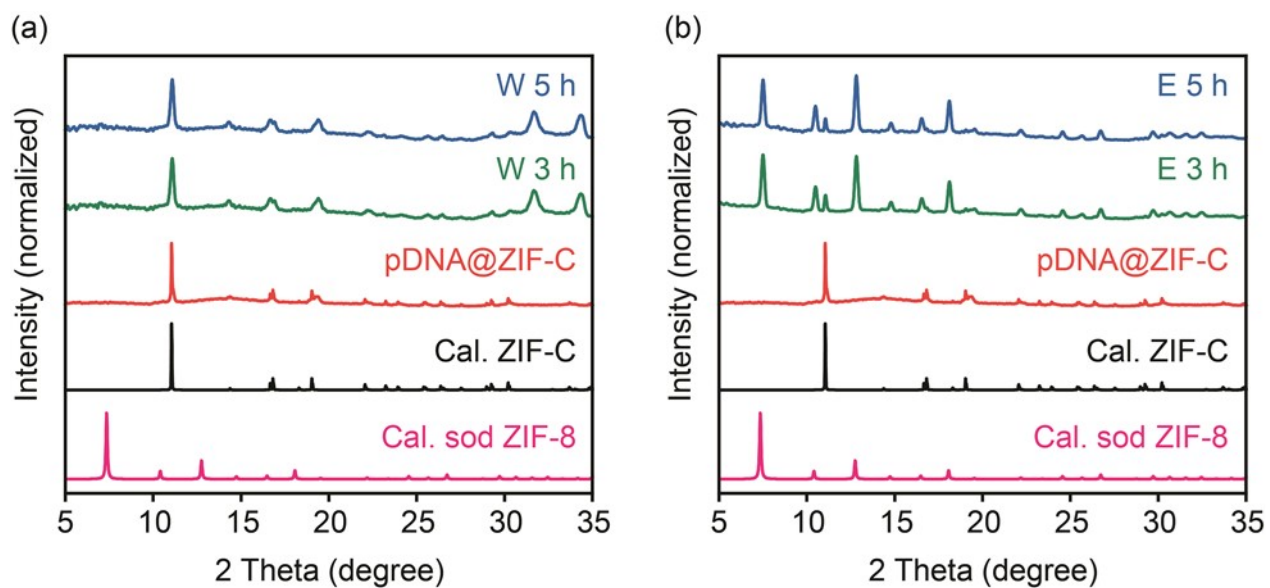

**Fig S11.** XRD of DNA@ZIF-C after (a) ethanol (E) and (b) water (W) incubation.

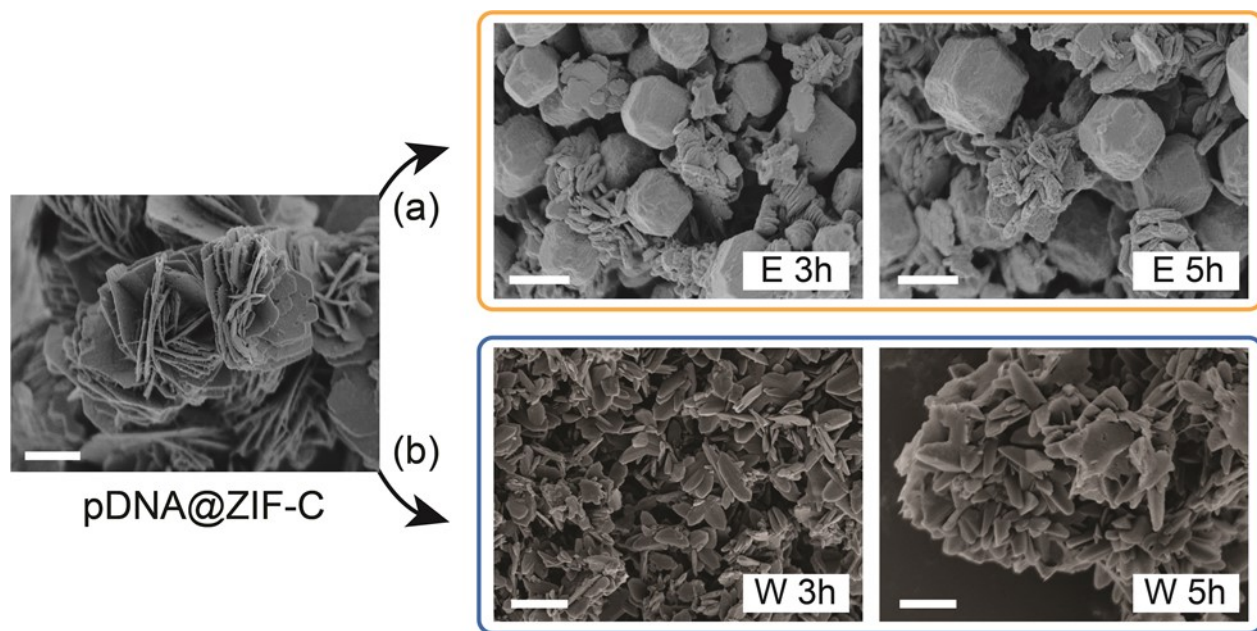

**Fig S12.** SEM of DNA@ZIF-C after (a) ethanol (E) and (b) water (W) incubation. Scale bar refers 500 nm.



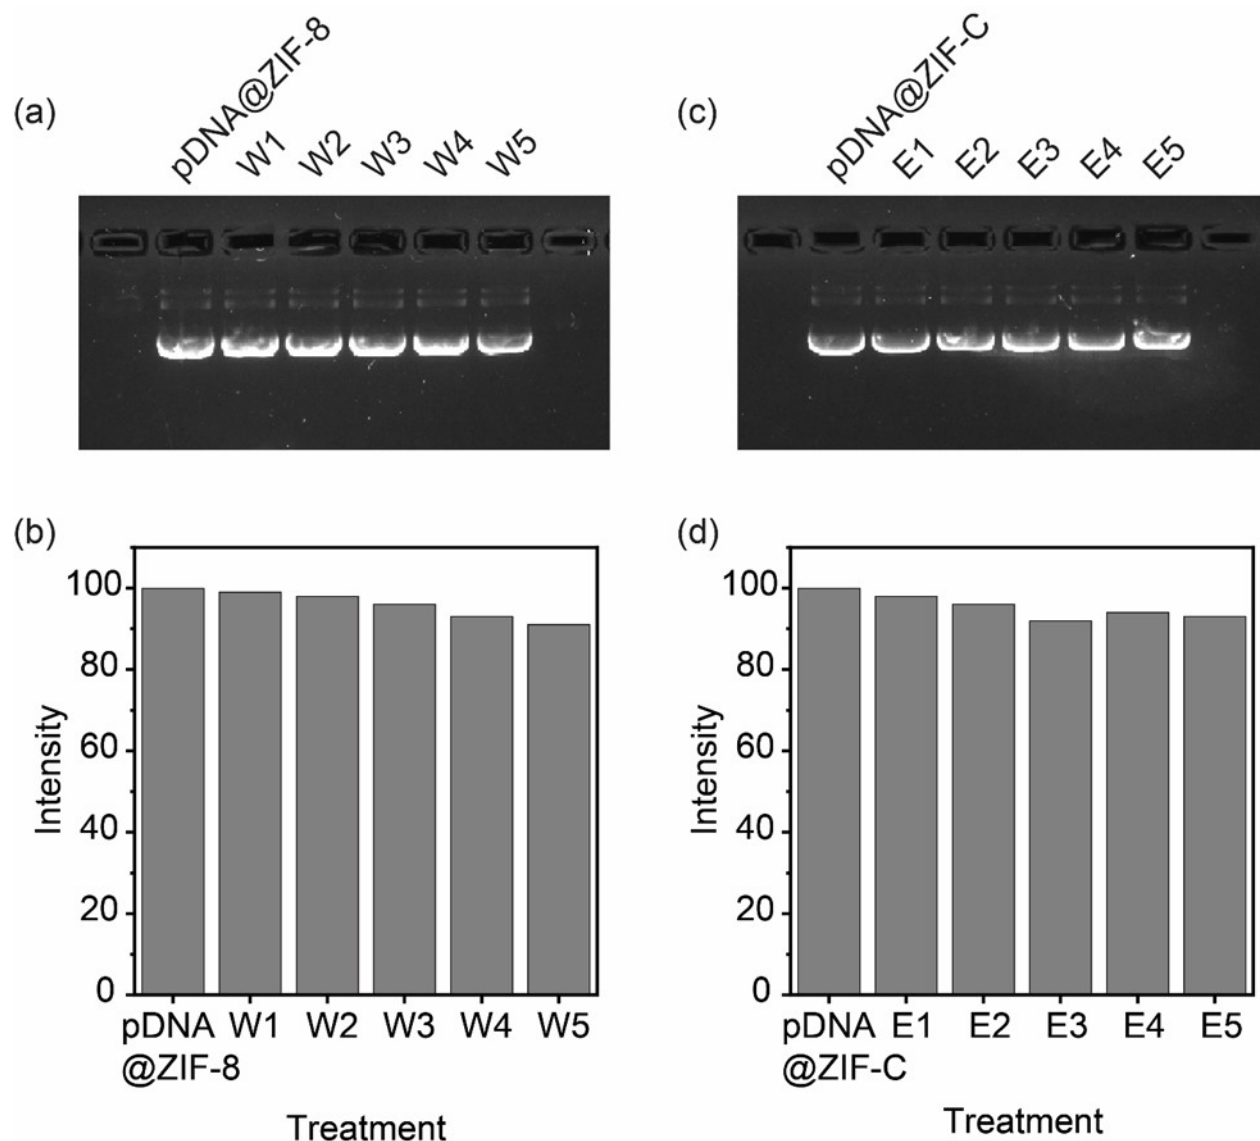

**Fig. S13** Determination of DNA@ZIF content in (a-b) DNA@ZIF-8 and (c-d) DNA@ZIF-C after subsequent 5-times water (W) and ethanol (E) wash. Agarose gel electrophoresis of (a) DNA@ZIF-8 and (c) DNA@ZIF-C after 5 times washing with water and absolute ethanol, respectively. The DNA@ZIF band intensity of DNA@ZIF-8 and DNA@ZIF-C after corresponding treatment was plotted in (b) and (d).

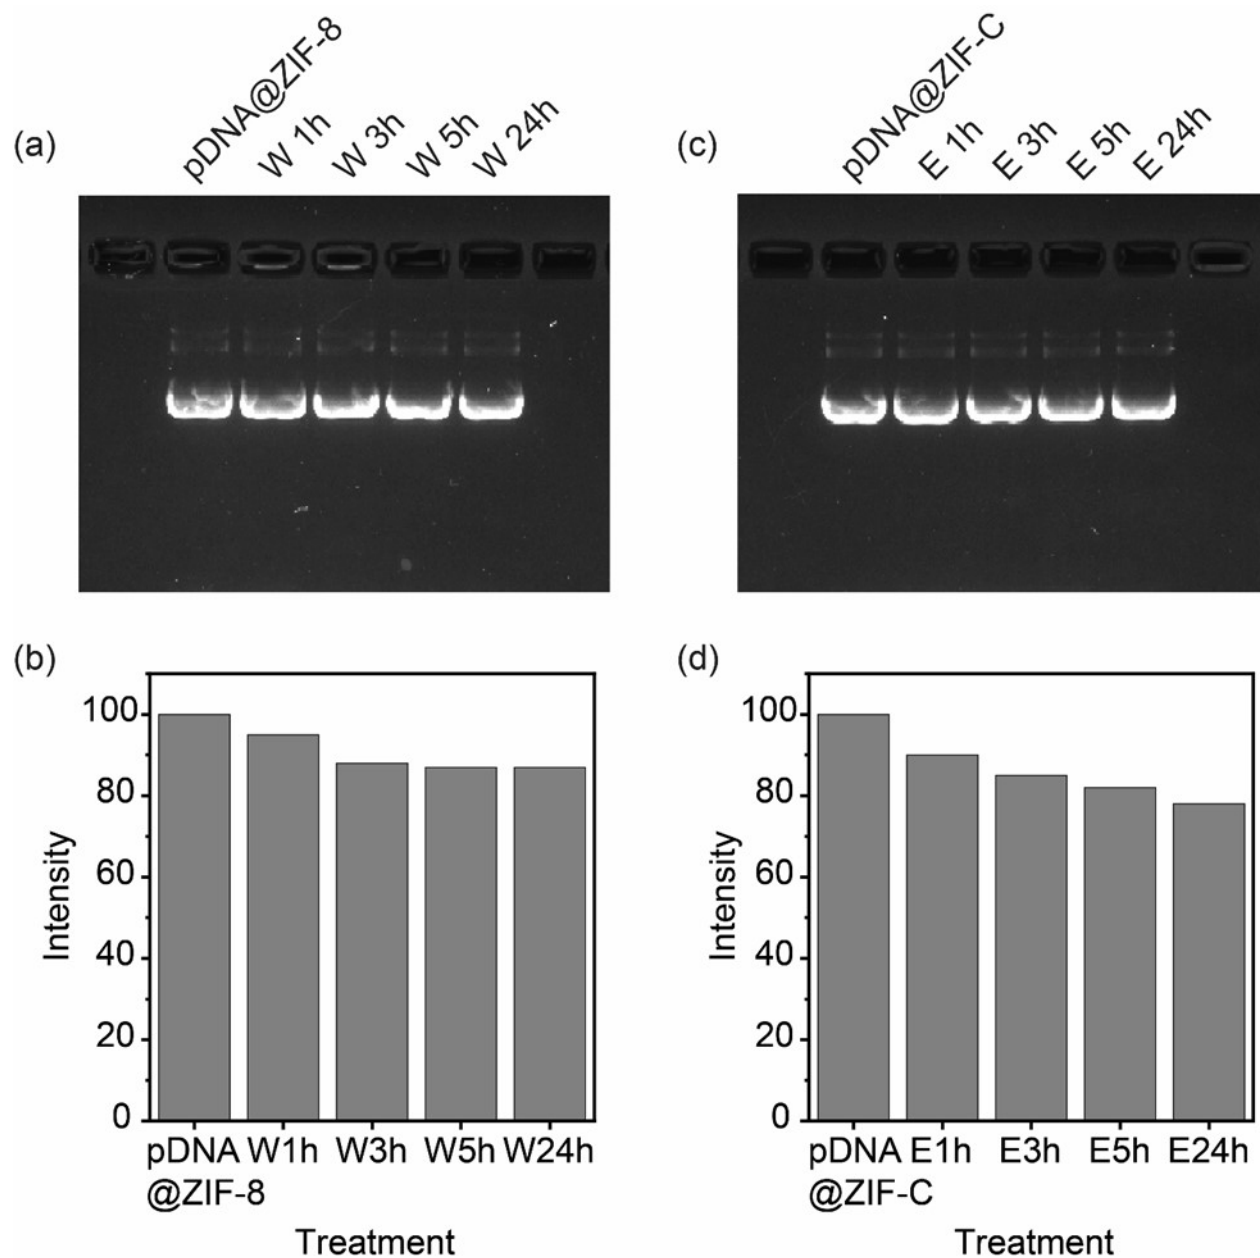

**Fig S14.** Determination of DNA@ZIF content in (a-b) DNA@ZIF-8 and (c-d) DNA@ZIF-C after incubation in (a) water (W) and (b) ethanol (E) for different points. Agarose gel electrophoresis of (a) DNA@ZIF-8 and (c) DNA@ZIF-C after incubating in water and absolute ethanol, respectively. The DNA band intensity in DNA@ZIF-8 and DNA@ZIF-C after the corresponding treatment was plotted in (b) and (d).

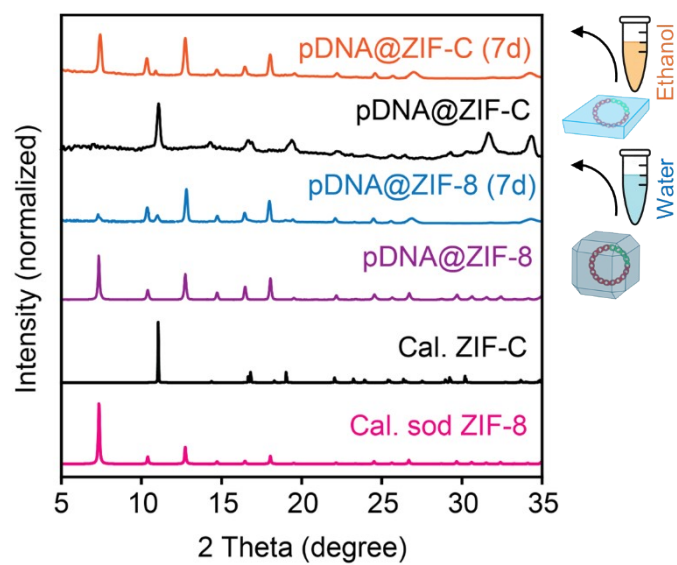

**Fig S15.** XRD of 7-days aged ZIF biocomposites.

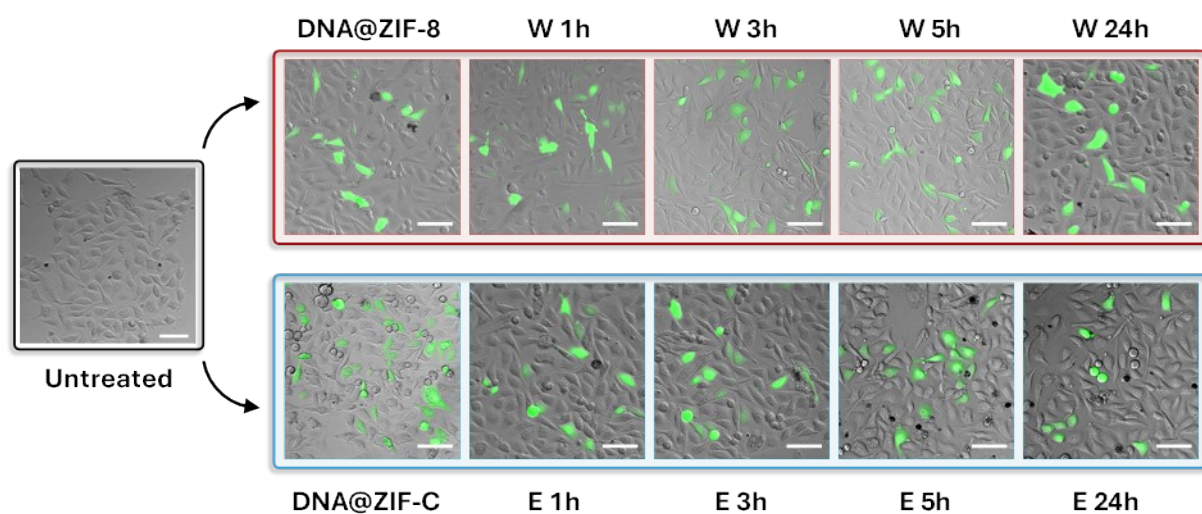

**Fig S16.** PC-3 cells transfected with GFP plasmid. Scale bar refers 100  $\mu\text{m}$ .

a

**References:**

1. Shi, Y., Shi, M., Wang, Y., You, J. Progress and prospects of mRNA-based drugs in pre-clinical and clinical applications. *Signal Transduction and Targeted Therapy*, 2024, 9, 322.
2. Wang, A., Walden, M., Ettlinger, R., Kiessling, F., Gassensmith, J.J., Lammers, T., Wuttke, S., Peña, Q. Biomedical metal–organic framework materials: perspectives and challenges. *Advanced Functional Materials*, 2024, 34, 2308589.
3. Hoop, M., Walde, C.F., Riccò, R., Mushtaq, F., Terzopoulou, A., Chen, X.Z., deMello, A.J., Doonan, C.J., Falcaro, P., Nelson, B.J., Puigmarti-Luis, J., Pané, S. Biocompatibility characteristics of the metal organic framework ZIF-8 for therapeutical applications. *Applied Materials Today*, 2018, 11, 13-21.
4. Nasri, N., Azad, M., Mehrabi, Z., Dini, G., Marandi, A. Metal–organic frameworks for biomedical applications: bridging materials science and regenerative medicine. *RSC Advances*, 2025, 15, 34481-34509.
5. Eugster, R., P. Luciani, Liposomes: Bridging the gap from lab to pharmaceuticals. *Current Opinion in Colloid & Interface Science*, 2025. 75, 101875.
6. Păun, C., Motelică, L., Ficaï, D., Ficaï, A., Andronescu, E. Metal-organic frameworks: Versatile platforms for biomedical innovations. *Materials*, 2023, 16, 6143.
7. Choudhury, A., Kirti, A., Lenka, S.S., Naser, S.S., Sinha, A., Kumari, S., Kaushik, N.K., Ghosh, A., Verma, S.K. Strategic advances in liposomes technology: translational paradigm in transdermal delivery for skin dermatosis. *Journal of Nanobiotechnology*, 2025, 23, 576.
